# Supplementary material for: Traditional Chinese medicine: A Bayesian network model of public awareness, usage determinants, and perception of scientific support in Austria
Source: bioRxiv or medRxiv preprint supplement (doi:10.1101/2021.12.24.21268331), 2021-12-26
Supplement: Supplementary file [file media-1.pdf]

## Survey evaluating the status and perception of traditional Chinese medicine in the Austrian population

(German introduction and data protection agreement not translated)

### 1. CAPTCHA:

Please solve the following calculation to prove you are not a robot.

Eight plus three equals (free form)

### 2. Are you familiar with the term traditional Chinese medicine (TCM)?

Yes

No

### 3. Have you ever used Traditional Chinese medicine (TCM) or been treated with TCM?

Yes

No

I am unfamiliar with TCM

I do not know

### 4. How often have you used TCM-related services within the past three years?

0 times

1– <5 times

5 – <10 times

10 – <20 times

20 or more times

I am unfamiliar with TCM

I do not know

### 5. Do you agree with TCM being a scientifically supported treatment modality?

I completely agree

I mostly agree

I partly agree

I rather disagree

I do not agree

I am unfamiliar with TCM

I do not know

### 6. Would you trust TCM-certified medical doctors?

I completely agree

I mostly agree

I partly agree

I rather disagree

I do not agree

I am unfamiliar with TCM

I do not know

**7. How much money have you spent on medical treatments (consultations, medication etc.) in the past three years?**

0 €

1 – <100 €

100 – <250 €

250 – <500 €

500 – <750 €

750 – <1000 €

1000 € or more

I do not know

**8. How much money have you spent on TCM (TCM consultations, teas, acupuncture, etc.) in the past three years?**

0 €

1 – <100 €

100 – <250 €

250 – <500 €

500 – <750 €

750 – <1000 €

1000 € or more

I am unfamiliar with TCM

I do not know

**9. Have you used homeopathy in the past three years?**

Yes

No

I am not familiar with homeopathy

I do not know

**10. Have you recommended homeopathy to anyone within the past three years?**

Yes

No

I am not familiar with homeopathy

I do not know

**11. Would you vaccinate yourself or your children?**

Yes

Rather yes

Partly

Rather no

No

**12. Are you conscious about receiving your booster vaccines?**

Yes

Rather yes

Partially

Rather no

No

**13. Have you ever used acupuncture?**

Yes

No

I am not familiar with acupuncture

I do not know

**14. How often have you used acupuncture within the past three years?**

0 times

1 – <5 times

5 – <10 times

10 – <20 times

20 or more times

I am not familiar with acupuncture

I do not know

**15. How have you come across this survey?**

Heute.at

Facebook

Directly sent to me (E-Mail, SMS, etc.)

I participated in a street survey

Other

**16. With which gender do you identify?**

Female

Male

Other

**17. How old are you (in years)?**

free form

**18. What is your citizenship?**

Austria

Germany

Hungary

Romania

Serbia

Bosnia

Turkey

Croatia

Other (free form)

**19. What is your highest attained level of education?**

Elementary school

Secondary school (GSCE)

Apprenticeship

Further education (A-levels)

Special certificate (A-levels with an additional education in economics, cooking, etc.)

Bachelor's

Master's  
PhD

**20. Are you employed at the moment?**

Yes, I am employed

No, I am unemployed

No, I am retired

No, I am a housewife/househusband

No, I am currently in training

None of the above-mentioned

**21. What is your net monthly income? (Monthly income is defined as the amount of money obtained after deduction of taxes. Additionally, please include official sponsorships and other financial support)**

I do not have an income

Less than 250 €

250€ – <500€

500€ – <1000€

1000€ – <1500€

1500€ – <2000€

2000€ – <2500€

2500€ – <3000€

3000€ – <3500€

3500€ – <4000€

4000€ or more

I do not wish to comment

**22. Are you currently suffering from a chronic disease or have you suffered from a chronic disease in the past three years? (A chronic disease is defined as a disease that develops slowly and lasts longer than four weeks)**

Yes

No
