# Supplementary material for: Traditional Chinese medicine: A Bayesian network model of public awareness, usage determinants, and perception of scientific support in Austria
Source: bioRxiv or medRxiv preprint supplement (doi:10.1101/2021.12.24.21268331), 2021-12-26
Supplement: Supplementary file [file media-2.pdf]

Supplementary figures presenting the raw data, that has not been post-stratified (Figure 2-4)

Partial correlation network (raw-data)



Correlation network (raw-data)



**A. Individual variables**

- 1: Gender
- 2: Age
- 3: Income
- 4: Education
- 5: Medical expenses
- 6: Chronic disease

**B. TCM**

- 7: TCM usage frequency
- 8: Perception of scientific support
- 9: Trust in TCM-certified MDs
- 10: TCM expenses

**C. Homeopathy**

- 11: Homeopathy usage
- 12: Homeopathy propagation

**D. Vaccination**

- 13: Vaccination usage
- 14: Booster vaccination

**E. Acupuncture**

- 15: Acupuncture usage frequency

**Figure 2S:** Bayesian network model of the raw-data depicting (A) partial correlations and (B) marginal correlations of variables obtained through the cross-sectional survey. Blue edges indicate positive (partial) correlations, while red edges represent negative (partial) correlations. The circles around the nodes give the posterior mean of the explained variance for the respective variable (more precisely depicted in figure 4).

## Partial correlations between all variables (raw-data)



**Figure 3S:** Detailed summary of partial correlations observed in the Bayesian network model of the raw-data for all included nodes. Partial correlations are summarised with posterior means and 95% credible intervals.



**Figure 4S:** Posterior distributions of the variance explained by all other variables in the model of the raw data, shown for each queried item.
